# Supplementary material for: Targeted Transgene Activation in the Brain Tissue by Systemic Delivery of Engineered AAV1 Expressing CRISPRa
Source: PubMed Central journal article supplement — Mol Ther Nucleic Acids. 2019 Apr 23;16:637–49. doi: 10.1016/j.omtn.2019.04.015 (PMC6526230; doi:10.1016/j.omtn.2019.04.015), 2019-04-23
Supplement: mmc1.pdf [file mmc1.pdf]

**OMTN, Volume 16**

**Supplemental Information**

**Targeted Transgene Activation  
in the Brain Tissue by Systemic Delivery  
of Engineered AAV1 Expressing CRISPRa**

**Cia-Hin Lau, Jonathan Weng-Thim Ho, Pik Kwan Lo, and Chung Tin**

## SUPPLEMENTAL FIGURES

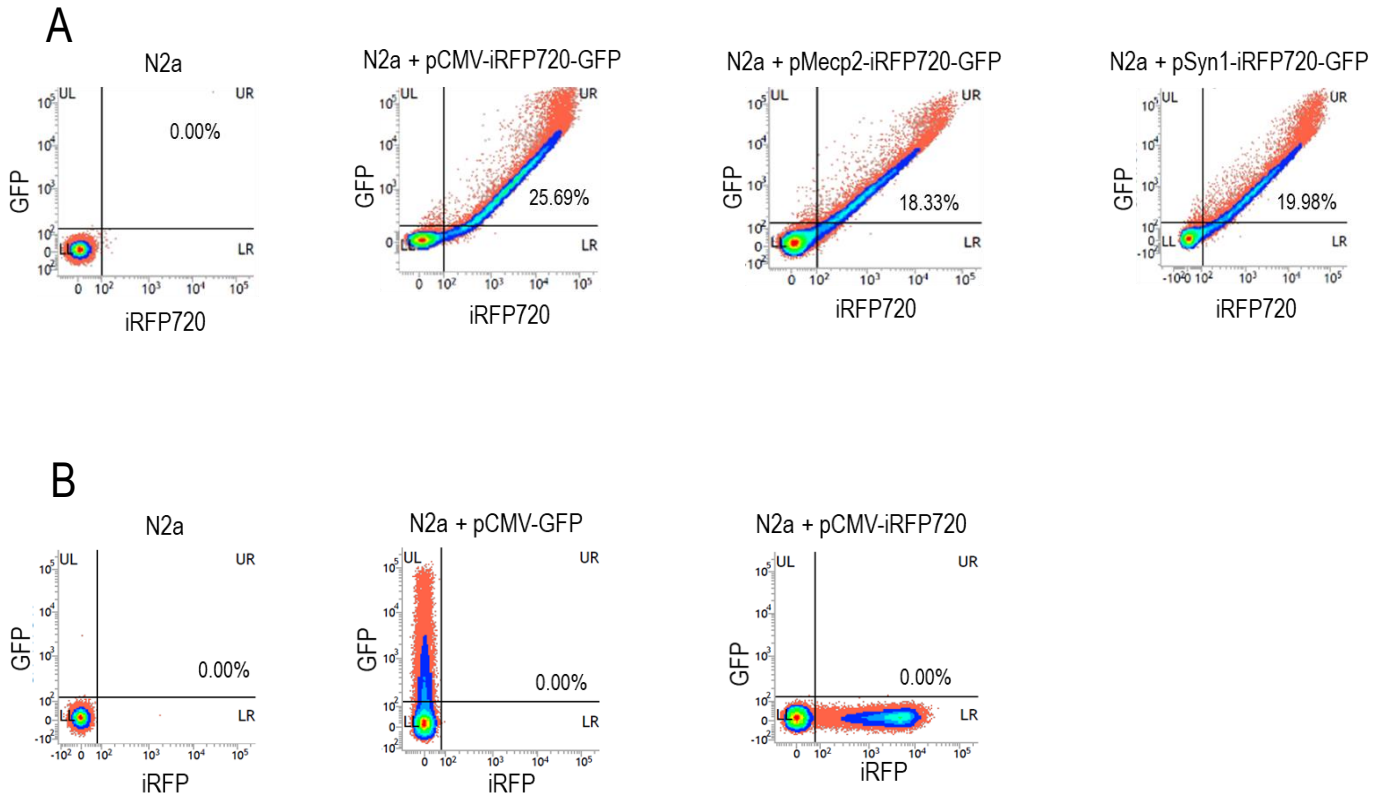

**Figure S1. Flow Cytometry Analysis to Quantify iRFP720 and GFP Expressing Cells.** (A) Flow cytometry analysis of mouse N2a cells after transfected with iRFP720-GFP fusion vector driven by different promoters. (B) Flow cytometry analysis of mouse N2a cells after transfected with iRFP or GFP alone. Two days after plasmids transfection, the iRFP720- and GFP-expressing cells were analysed with flow cytometry. The fluorescent channels APC-H7 and FITC were used to detect the iRFP720- and GFP-expressing cells, respectively.

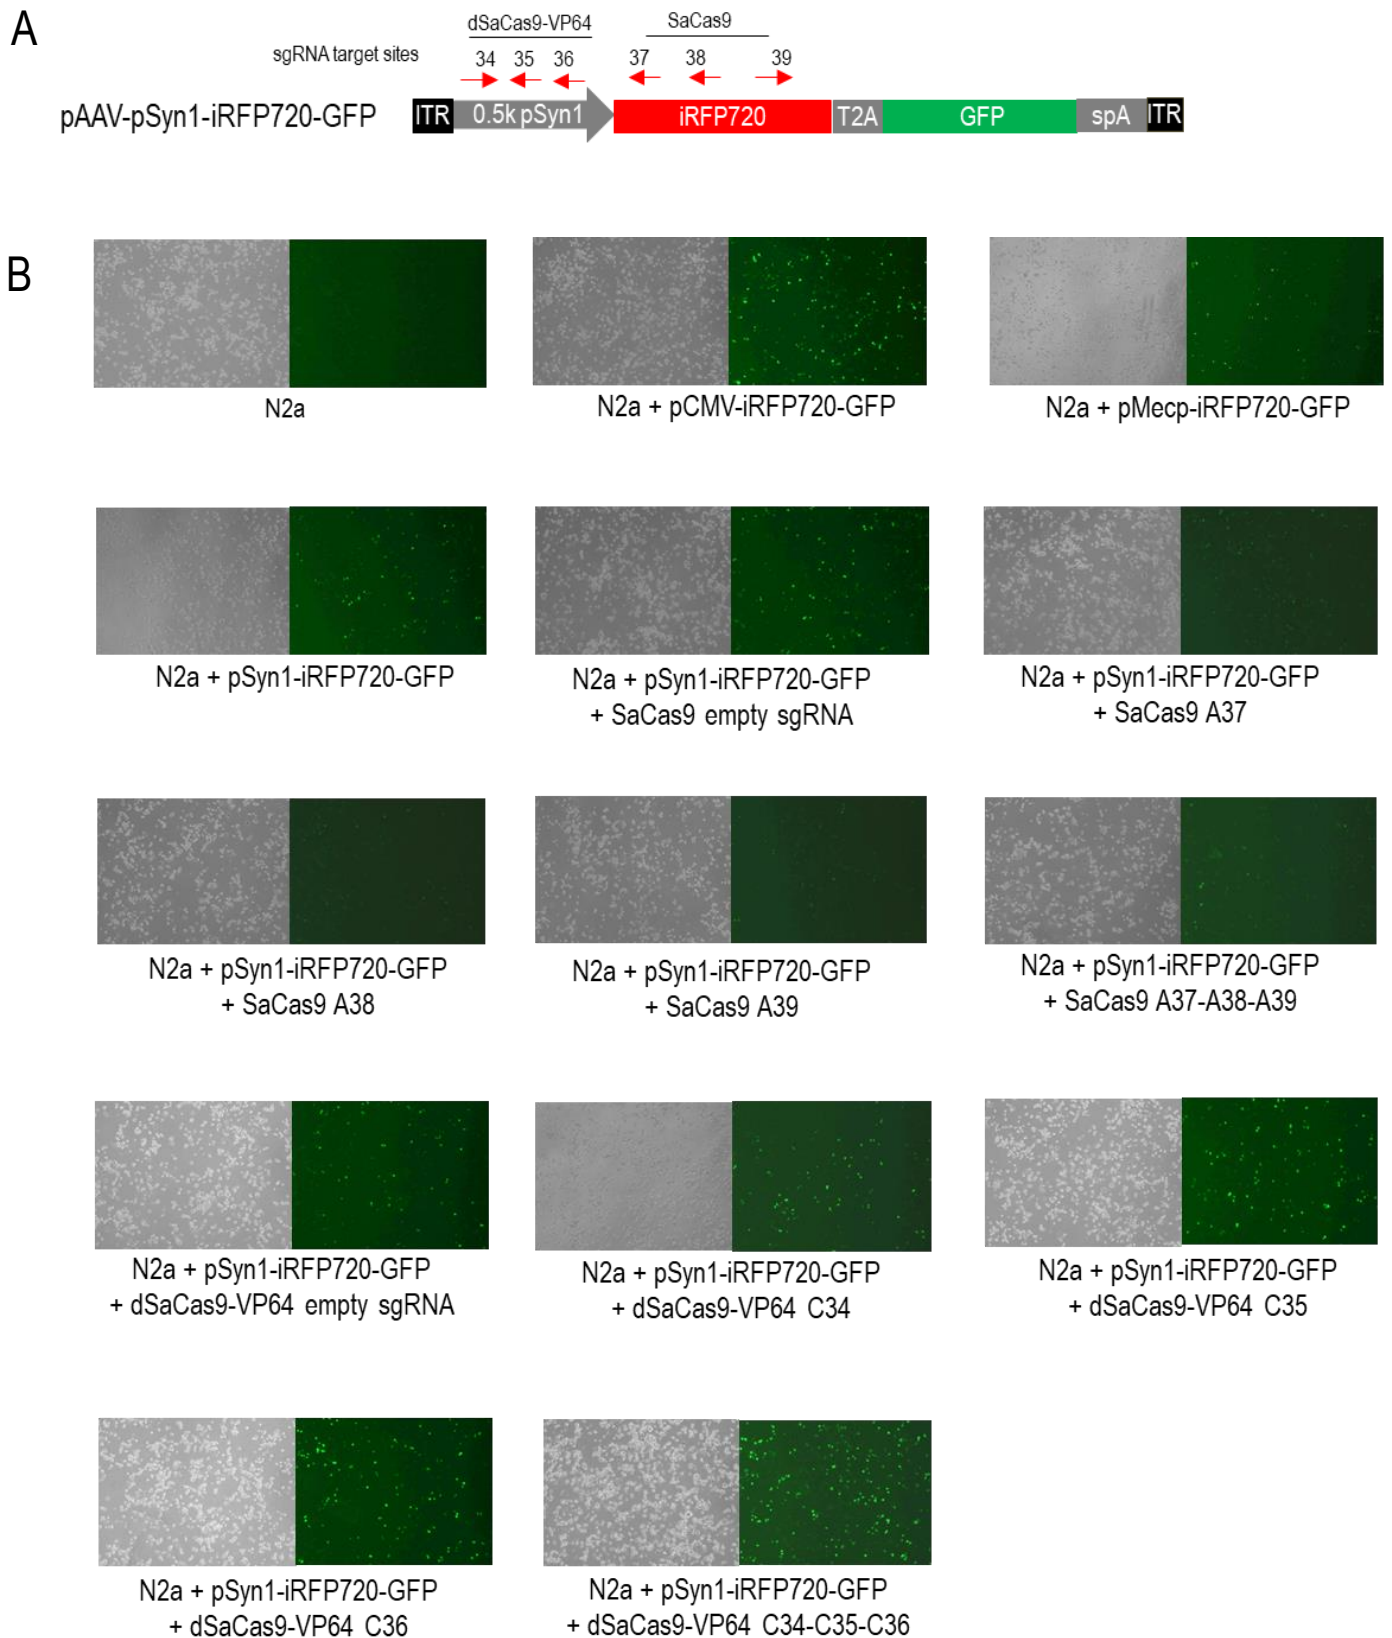

**Figure S2. CRISPR-mediated Modulation of Bicistronic Infrared-GFP Fluorescent Reporter Genes Expression in Mouse N2a Cells.** (A) sgRNA target sites on hSyn1 promoter and iRFP720. The location of three different sgRNA target sites of dSaCas9-VP64 designed to target the hSyn1 promoter, and three different sgRNA target sites of SaCas9 designed to target the iRFP720 open reading frame are shown. Red arrows indicate the sense or antisense orientation of sgRNAs designed to recognize target DNA sequences. (B) Cellular images of GFP protein expression in mouse N2a cells. Two days after plasmids co-transfection of various CRISPR and iRFP720-GFP reporter genes, cellular images of GFP protein expression were taken under fluorescent microscope at 4X magnification. The left and right panels are phase contrast and GFP fluorescent images, respectively.

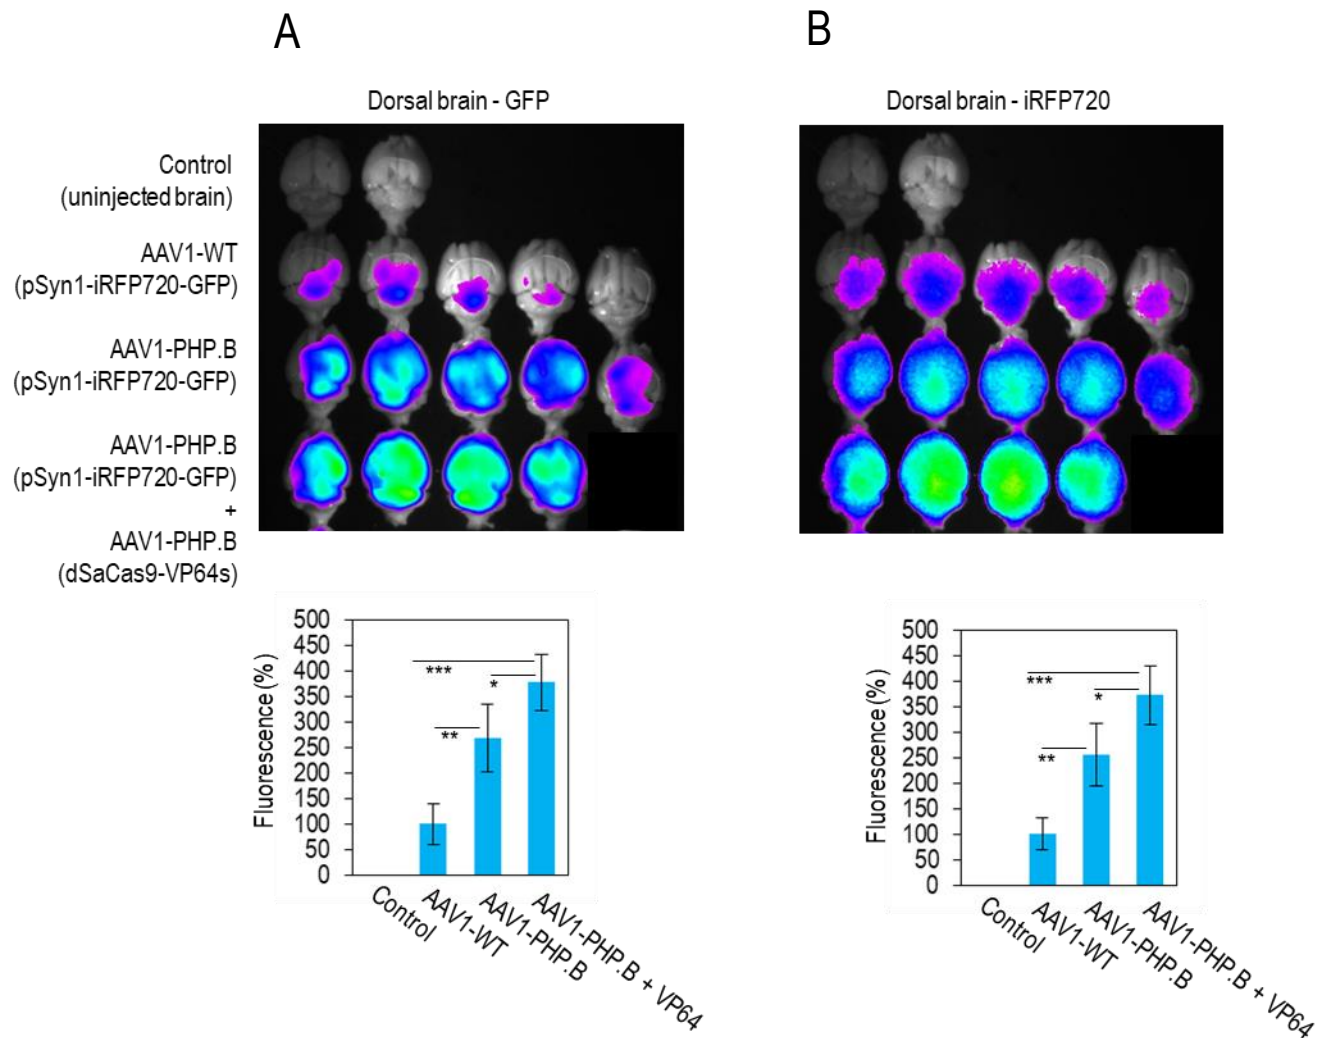

**Figure S3. Ex Vivo Imaging of the Dissected Dorsal Brain Tissues.** Ex vivo imaging was carried out to detect and quantify the (A) GFP and (B) iRFP720 fluorescent signals on the mouse dorsal brains. AAV1-PHP.B expressing dSaCas9-VP64 was injected together with AAV1-PHP.B expressing iRFP720 and GFP fluorescent proteins. The statistical significance levels are indicate as \* $P < 0.05$ , \*\* $P < 0.01$  and \*\*\* $P < 0.001$ . All data are presented as mean  $\pm$  standard deviation.

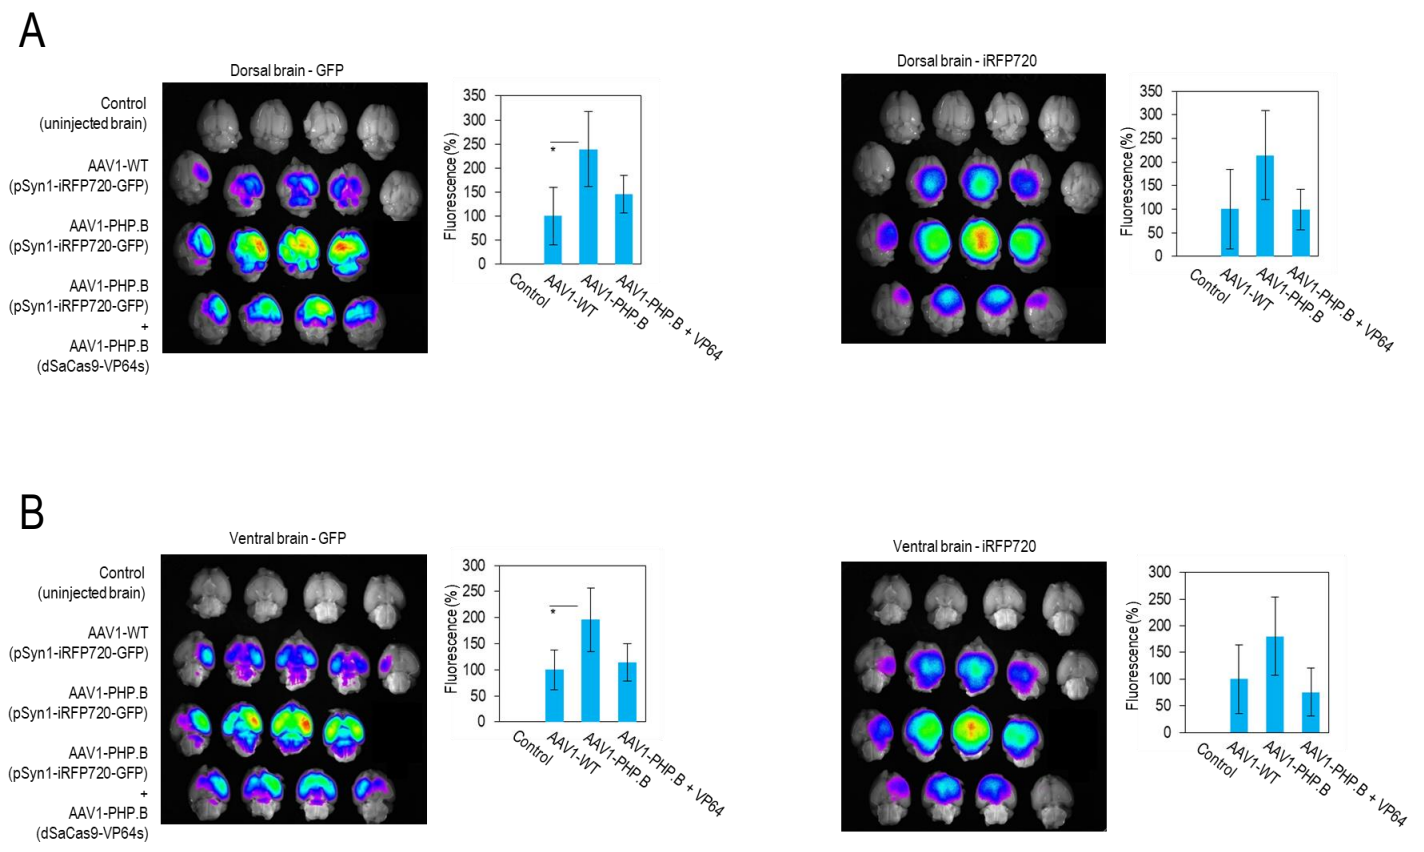

**Figure S4. Immune Responses Inhibit CRISPRa-mediated Transgene Activation in the Mouse Brains.** AAV1-PHP.B expressing dSaCas9-VP64 was introduced into the mice only after 24 hours tail-vein injection of AAV1-PHP.B expressing iRFP720 and GFP fluorescent proteins. Ex vivo imaging was carried out to detect and quantify the GFP (left) and iRFP720 (right) fluorescent signals on the mouse (A) dorsal and (B) ventral brains. The statistical significance levels are indicate as \* $P < 0.05$ , \*\* $P < 0.01$  and \*\*\* $P < 0.001$ . All data are presented as mean  $\pm$  standard deviation.

## SUPPLEMENTAL TABLES

**Table S1. Primers used for SaCas9s and dSaCas9-based CRISPR Backbone Construction**

| Primer Sequence (5' to 3')<br>(Forward, FP; Reverse, RP)                                                                                                           | Amplicon<br>Size (bp) | Description                                                                |
|--------------------------------------------------------------------------------------------------------------------------------------------------------------------|-----------------------|----------------------------------------------------------------------------|
| FP: GGGG GAATTC AATAAAAGATCTTTATTTTCATTAGA<br>TCTGTGTGTTGGTTTTTGTGT GGTACC GGGG<br>RP: CCCC GGTACC ACACAAAAACCAACACACAGATCTA<br>ATGAAAATAAAGATCTTTTATT GAATTC CCCC | -                     | 68 bp DNA fragment bearing EcoRI-spA-KpnI for CRISPR backbone construction |
| FP: CTGCGGCCTCTAGAAAGCTTAGC<br>RP: GGTACATGGTGGCACCGGT                                                                                                             | 268                   | PCR pMecp2 with added XbaI<br>PCR pMecp2 with added AgeI                   |
| FP: AAAA GGATCC GGACGGGCTGACGCATTGGACG<br>RP: AAAA GAATTC TTA GTTAATCAGCATGTCCAGGTCGA                                                                              | 177                   | PCR VP64 with added BamHI<br>PCR VP64 with added EcoRI-Stop                |
| FP: AAAA GGATCC GGGCGCGCCGACGCGCTGGACGAT<br>RP: AAAA GAATTC TTAATCGATATACAACATATCCAAATCGAAGTCATCG                                                                  | 414                   | PCR VP160 with added BamHI<br>PCR VP160 with added EcoRI-Stop              |
| FP: AAAA GGATCC ATGGACGCGAAATCACTTACGGCA<br>RP: AAAA GAATTC TTA TACCAGCCAAGGTTCTTCCCCT                                                                             | 237                   | PCR KRAB with added BamHI<br>PCR KRAB with added EcoRI-Stop                |
| FP: AAAA GGATCC AGCCCCAAGAAAAAGAGGAAGGTGG<br>RP: AAAA GAATTC TTA GGGCAGCATAGAGGCATAGCCA                                                                            | 429                   | PCR SID4X with added BamHI<br>PCR SID4X with added EcoRI-Stop              |
| FP: CAGCACAGACATTCTGGGCAACCT                                                                                                                                       | -                     | Sequencing BamHI-domain-spA                                                |
| FP: GATCGAGGAAATCATCCGGACCAC                                                                                                                                       | -                     | Sequencing dSaCas9 (mutation N580A)                                        |
| FP: GCAGGTTGTAGTGAACAGCAGCT                                                                                                                                        | -                     | Sequencing pMecp2-dSaCas9 (mutation D10A)                                  |

**Table S2. Primers used for Single Guide RNAs Designed**

| Primer Sequence (5' to 3')<br>(Forward, FP; Reverse, RP)             | Target<br>sequence<br>(bp) | Description                                                                                   |
|----------------------------------------------------------------------|----------------------------|-----------------------------------------------------------------------------------------------|
| FP: CACC GGGCGAGCAGCAGTCCATGCGG<br>RP: AAAC CCGCATGGACTGCTGCTCGCCC   | 22                         | SaCas9-37 construction for exonic knockout of iRFP720                                         |
| FP: CACC GGTTCGGCGGCCTGCAGGCG<br>RP: AAAC CGCCTGCAGGCCGCCGAAACC      | 21                         | SaCas9-38 construction for exonic knockout of iRFP720                                         |
| FP: CACC GGCTCTATACCATCAACCCGGT<br>RP: AAAC ACCGGGTTGATGGTATAGAGCC   | 22                         | SaCas9-39 construction for exonic knockout of iRFP720                                         |
| FP: CACC GGGCCCTGCGTATGAGTGCAA<br>RP: AAAC TTGCACTCATACGCAGGGCCC     | 21                         | dSaCas9-34 construction for modulating promoter activity of hSyn1                             |
| FP: CACC GTTGGGTGCTTGTCCAGTGGGT<br>RP: AAAC ACCCACTGGACAAGCACCCAAC   | 22                         | dSaCas9-35 construction for modulating promoter activity of hSyn1                             |
| FP: CACC GCGACCAAGGTGGCCGGGAAG<br>RP: AAAC CTTCCGGCCACCTTGGTGC       | 21                         | dSaCas9-36 construction for modulating promoter activity of hSyn1                             |
| FP: CACC GTGTGAAGGTGCTGGCTGGTC<br>RP: AAAC GACCAGCCAGCACCTTCACAC     | 21                         | SaCas9-40 construction for exonic knockout of mouse alpha CaMKII                              |
| FP: CACC GATACCCAACCAGCAAGATATA<br>RP: AAAC TATATCTTGTCTGGTGGTATC    | 22                         | SaCas9-41 construction for exonic knockout of mouse alpha CaMKII                              |
| FP: CACC GGACACCGTACCCCAAGGCC<br>RP: AAAC GGCTTCTGGGGTGACGGTGTCC     | 22                         | SaCas9-42 construction for exonic knockout of mouse alpha CaMKII                              |
| FP: CACC GACTCGTCAGCTTGTGGATGAG<br>RP: AAAC CTCATCCACAAGCTGACGAGTC   | 22                         | dSaCas9-9 construction for modulating distal super-enhancer activity of mouse alpha CaMKII    |
| FP: CACC GCGTAGGTTGTGATTTGTGT<br>RP: AAAC ACACAAATACACAACCTACGC      | 21                         | dSaCas9-8 construction for modulating distal super-enhancer activity of mouse alpha CaMKII    |
| FP: CACC GCCAGGGTGGCAAGCCAGCAAG<br>RP: AAAC CTTGCTGGCTTGCCACCCTGGC   | 22                         | dSaCas9-7 construction for modulating distal super-enhancer activity of mouse alpha CaMKII    |
| FP: CACC GGCATCAAGGAGTCAAGCATGC<br>RP: AAAC GCATGCTTGACTCCTTGATGCC   | 22                         | dSaCas9-6 construction for modulating proximal super-enhancer activity of mouse alpha CaMKII  |
| FP: CACC GCCTTTGGTAGACACCTGCATG<br>RP: AAAC CATGCAGGTGTCTACCAAGGC    | 22                         | dSaCas9-5 construction for modulating proximal super-enhancer activity of mouse alpha CaMKII  |
| FP: CACC GGGCTAAGGGATAGGCAGGTCC<br>RP: AAAC GGACCTGCCTATCCCTTAGCCC   | 22                         | dSaCas9-4 construction for modulating proximal super-enhancer activity of mouse alpha CaMKII  |
| FP: CACC GAGCAAGTGGACCCTGTTCCCC<br>RP: AAAC GGGGAACAGGGTCCACTTGCTC   | 22                         | dSaCas9-1 construction for modulating promoter activity of mouse alpha CaMKII                 |
| FP: CACC GCAGTTGCTATGGTAACGGCTA<br>RP: AAAC TAGCCGTTACCATAGCAACTGC   | 22                         | dSaCas9-2 construction for modulating promoter activity of mouse alpha CaMKII                 |
| FP: CACC GAGAAGAAGTACCAACAGACC<br>RP: AAAC GGTCTGTTTGTACTTCTTCTC     | 22                         | dSaCas9-3 construction for modulating promoter activity of mouse alpha CaMKII                 |
| FP: CACC GAGAAGCAGACCAGATGGGATG<br>RP: AAAC CATCCCATCTGGTCTGCTTCTC   | 22                         | dSaCas9-30 or dSaCas9-31 construction for modulating promoter activity of human <i>PDGFRA</i> |
| FP: CACC GAGGGCCCTATTTCTCGTTGGG<br>RP: AAAC CCAACGAGAAATAGGGCCCTC    | 22                         | dSaCas9-29 construction for modulating promoter activity of human <i>PDGFRA</i>               |
| FP: CACC GTTGAAGTCAATATGACAATG<br>RP: AAAC CATTGTCATATTGGACTCAAC     | 21                         | dSaCas9-28 construction for modulating promoter activity of human <i>PDGFRA</i>               |
| FP: CACC GTTACTTCGCTTTCTCCAGTCC<br>RP: AAAC GGAAGTGGAGAAAGCGAAGTAAAC | 22                         | dSaCas9-32 construction for modulating expression level of human <i>PDGFRA</i>                |
| FP: CACC GGCCTACAGCACAGGGAGCCGG<br>RP: AAAC CCGGCTCCCTGTGCTGTAGGCC   | 22                         | dSaCas9-33 construction for modulating expression level of human <i>PDGFRA</i>                |
| FP: CACC GATCTCGAAGGAAGGCGACAC<br>RP: AAAC GTGTCGCCTTCCCTCGAGATC     | 21                         | dSaCas9-10 construction for modulating promoter activity of mouse <i>Mycn</i>                 |
| FP: CACC GGAGTGCAGCGGGTGAAGCCA<br>RP: AAAC TGGCTTGCACCCGCTGCACTCC    | 22                         | dSaCas9-11 construction for modulating promoter activity of mouse <i>Mycn</i>                 |
| FP: CACC GACAGTCATCTGTCTGGACGCG<br>RP: AAAC CGCGTCCAGACAGATGACTGTC   | 22                         | dSaCas9-12 or dSaCas9-13 construction for modulating promoter activity of mouse <i>Mycn</i>   |
| FP: CACC GGATCCGGAGGCGACTCGGGGC<br>RP: AAAC GCCCCGAGTGCCTCCGGATCC    | 22                         | dSaCas9-14 construction for modulating expression level of mouse <i>Mycn</i>                  |
| FP: CACC GTCTTCCAGCCAGGGTGCCT<br>RP: AAAC AGGCACCCTGGCTGGAAGAGAC     | 22                         | dSaCas9-15 construction for modulating expression level of mouse <i>Mycn</i>                  |
| FP: CACC GCCCGAGGGCCGGGCATGGAC<br>RP: AAAC GTCCATGCCCGCCCTCGGGC      | 21                         | dSaCas9-18 construction for modulating promoter activity of mouse <i>Nrf2</i>                 |
| FP: CACC GCGAGAGGAGGATCAACAGTG<br>RP: AAAC CACTGTTGATCCTCCTCTCGC     | 21                         | dSaCas9-17 construction for modulating promoter activity of mouse <i>Nrf2</i>                 |

|                                                                    |    |                                                                                |
|--------------------------------------------------------------------|----|--------------------------------------------------------------------------------|
| FP: CACC GGCAGTTGGCCTCTTGCAAAGT<br>RP: AAAC ACTTTGCAAGAGGCCAACTGCC | 22 | dSaCas9-16 construction for modulating promoter activity of mouse <i>Nrf2</i>  |
| FP: CACC GGCAGGACAAGGGCATGGAGG<br>RP: AAAC CCTCCATGCCCTTGTCTCTGCC  | 21 | dSaCas9-19 construction for modulating expression level of mouse <i>Nrf2</i>   |
| FP: CACC GGAGGATGTTGGGGCCGCGAC<br>RP: AAAC GTCGCGGCCCAACATCCTCC    | 21 | dSaCas9-20 construction for modulating expression level of mouse <i>Nrf2</i>   |
| FP: CACC GGCAGAGACACCACCCTCG<br>RP: AAAC CGAGGTGGTGGTGTCTCTGCC     | 21 | dSaCas9-21 construction for modulating expression level of mouse <i>Nrf2</i>   |
| FP: CACC GTTGGACCGTGCAGGCTGTGG<br>RP: AAAC CCACAGCCTGCACGGTCCAAC   | 21 | dSaCas9-24 construction for modulating promoter activity of mouse <i>Keap1</i> |
| FP: CACC GATAAATATCGCAACCAGGTAG<br>RP: AAAC CTACCTGGTTGCGATATTTATC | 22 | dSaCas9-23 construction for modulating promoter activity of mouse <i>Keap1</i> |
| FP: CACC GTGGAGCCTGCAAAGTGCAGC<br>RP: AAAC GCTGCACTTTGCAGGCTCCAC   | 21 | dSaCas9-22 construction for modulating promoter activity of mouse <i>Keap1</i> |
| FP: CACC GCGGGAGGGCGGAAACGGGCG<br>RP: AAAC CGCCCGTTTCCGCCCTCCCGC   | 21 | dSaCas9-25 construction for modulating expression level of mouse <i>Keap1</i>  |
| FP: CACC GGCACCTACAGAGACACCCGG<br>RP: AAAC CCGGGTGTCTCTGTAGGTGCC   | 21 | dSaCas9-26 construction for modulating expression level of mouse <i>Keap1</i>  |
| FP: CACC GGTGGCCGCGGCGAGTAGAGGT<br>RP: AAAC ACCTCTACTCGCCGCGCCACC  | 22 | dSaCas9-27 construction for modulating expression level of mouse <i>Keap1</i>  |
| FP: GCATATACGATACAAGGCTGTTAGAGAG                                   | -  | Sequencing pU6-sgRNA for successful of target sequence insertion               |



**Table S3. Primers used for Luciferase Reporter Vectors Construction**

| Primer Sequence (5' to 3')<br>(Forward, FP; Reverse, RP)                          | Amplicon<br>Size (bp) | Description                                                                                                                                                   |
|-----------------------------------------------------------------------------------|-----------------------|---------------------------------------------------------------------------------------------------------------------------------------------------------------|
| FP: AAAA GGTACC GAACCCATTATGGCCTTAGGTCAC<br>RP: AAAA AAGCTT CTAGGGCTGGGATGCTGAAGC | 1316                  | To insert amplified 1316bp mouse alpha CaMKII promoter into pGL4.10[luc2] with KpnI and HindIII                                                               |
| FP: GTCCTGCCACAGGCTTACCATG<br>RP: GTGATGGTAGCCATCCTGGCACT                         | 7kb                   | Nested PCR (outer primers) to amplify entire promoter and super-enhancer regions of mouse alpha CaMKII                                                        |
| FP: AAAA GAGCTC GGGGTGGTTGTAGAGCCTGCTAG<br>RP: AAAA AAGCTT CTAGGGCTGGGATGCTGAAGC  | 6.8kb                 | Nested PCR (inner primers) to amplify entire promoter and super-enhancer regions of mouse alpha CaMKII for inserting into pGL4.10[luc2] with SacI and HindIII |
| FP: TAGCAAATAGGCTGTCCCCAGTG<br>RP: CATGGTGGCTTTACCAACAGTACC                       | -                     | Sequencing enhancer or promoter that has been cloned into pGL4.10[luc2] firefly luciferase vector                                                             |

**Table S4. Primers used for PCR and Quantitative RT-PCR**

| Primer Sequence (5' to 3')<br>(Forward, FP; Reverse, RP)     | Amplicon<br>Size (bp) | Description                                                |
|--------------------------------------------------------------|-----------------------|------------------------------------------------------------|
| FP: ACCATCTTCCAGGAGCGAGA<br>RP: TGGCATGGACTGTGGTCATG         | 319                   | qPCR mRNA expression level of human and mouse <i>Gapdh</i> |
| FP: GCTCAGCCCTGTGAGAAGAC<br>RP: ATTGCGGAATAACATCGGAG         | 95                    | qPCR mRNA expression level of human <i>PDGFRA</i>          |
| FP: TGATGCCAGCCACTGTATCC<br>RP: CTGCGAACCCAAACCATGC          | 194                   | qPCR mRNA expression level of mouse alpha CaMKII           |
| FP: CCTCCGGAGAGGATACCTTG<br>RP: TCTCTACGGTGACCACATCG         | 90                    | qPCR mRNA expression level of mouse <i>Mycn</i>            |
| FP: GATCCGCCAGCTACTCCCAGGTTG<br>RP: CAGGGCAAGCGACTCATGGTCATC | 122                   | qPCR mRNA expression level of mouse <i>Nrf2</i>            |
| FP: CATTGGCATCGCCAACTTCG<br>RP: GGAACACCTCGGACTCGCA          | 188                   | qPCR mRNA expression level of mouse <i>Keap1</i>           |

**Table S5. Primers used for Construction of iRFP720-GFP Fusion Transgenes**

| Primer Sequence (5' to 3')<br>(Forward, FP; Reverse, RP)                            | Amplicon<br>Size (bp) | Description                                                                                                          |
|-------------------------------------------------------------------------------------|-----------------------|----------------------------------------------------------------------------------------------------------------------|
| FP: AAAA ACCGGT ATGGCGGAAGGATCCGTCGC<br>RP: AAAA GAATTC CTCTTCCATCACGCCGATCTGC      | 948                   | To insert amplified 948bp iRFP720 into pAAV-pMecp2-SpCas9-spA by replacing SpCas9 with AgeI and EcoRI                |
| FP: AAAA GAATTC GAGGGCAGAGGATCCCTGCTA<br>RP: AAAA GAATTC TTAATTGTACAGCTCGTCCATGCC   | 774                   | To insert amplified 774bp T2A-GFP into pAAV-pMecp2-iRFP720-spA with EcoRI                                            |
| FP: AAAA TCTAGA GTGGATAACCGTATTACCGCCATGC<br>RP: AAAA ACCGGT GCTAGCGGATCTGACGGTTCAC | 553                   | To insert amplified 553bp CMV promoter into pAAV-pMecp2-iRFP720-T2A-GFP-spA by replacing pMecp2 with XbaI and AgeI   |
| FP: AAAA TCTAGA CGCGTGTGTCTAGACTGCAGAG<br>RP: AAAA ACCGGT GTACCTTCTCGACTGCGCTCTCA   | 476                   | To insert amplified 476bp hSyn1 promoter into pAAV-pMecp2-iRFP720-T2A-GFP-spA by replacing pMecp2 with XbaI and AgeI |
| FP: GCCATCACCGAACGCCGT                                                              | -                     | Sequencing T2A-GFP that has been cloned into pAAV-pSyn1-iRFP720-T2A-GFP-spA vector                                   |
| FP: TTCATCGGCTCCTGGCATC                                                             | -                     | Sequencing iRFP720-T2A that has been cloned into pAAV-pSyn1-iRFP720-T2A-GFP-spA vector                               |
| RP: AGATCATCACCCGATCGAAGC                                                           | -                     | Sequencing pSyn1-iRFP720 that has been cloned into pAAV-pSyn1-iRFP720-T2A-GFP-spA vector                             |
| RP: ACCGCACAGATGCGTAAGGAG                                                           | -                     | Sequencing GFP-spA that has been cloned into pAAV-pSyn1-iRFP720-T2A-GFP-spA vector                                   |

**Table S6. Primers used for Modification of AAV1 Capsid**

| Primer Sequence (5' to 3')<br>(Forward, FP; Reverse, RP)                                                                                                                                                                                    | Amplicon<br>Size (bp) | Description                                                                    |
|---------------------------------------------------------------------------------------------------------------------------------------------------------------------------------------------------------------------------------------------|-----------------------|--------------------------------------------------------------------------------|
| FP: AAAATGGCCACCGAAAGATTTGGGACCGTGGCAGTCAATTTCCAGAGCAGCA<br>GCACTTTGGCGGTGCCTTTTAAGACAGACCCTGCGACCGGAGATGTGCATGCAAAA<br>RP: TTTTGCATGCACATCTCCGGTCGCAGGGTCTGTCTTAAAGGCACCGCCAAA<br>GTGCTGCTGCTCTGGAAATTGACTGCCACGGTCCCAAATCTTTCGGTGGCCATTTT | -                     | 108 bp DNA fragment bearing MscI-PHP.B-SphI<br>for modification of AAV1 capsid |
| FP: TCCATCATCAACCCTGGCACTG                                                                                                                                                                                                                  | -                     | sequencing AAV1 capsid for validating 21bp of<br>PHP.B sequence insertion      |

**Table S7. Primers used for TaqMan qPCR**

| Primer Sequence (5' to 3')<br>(Forward, FP; Reverse, RP) | Amplicon<br>Size (bp) | Description                               |
|----------------------------------------------------------|-----------------------|-------------------------------------------|
| 6-FAM-AGCGCCATCCGCCGCCTGCA-ZEN/Iowa                      | -                     | probe specific to iRFP720                 |
| FP: TTCATCGGCTCCTGGCATC<br>RP: AGATCATCACCCGATCGAAGC     | 204                   | quantify the copies number of iRFP720 DNA |
| 6-FAM-CACCACGCCGAGGACGCCCTGA-ZEN/Iowa                    | -                     | probe specific to dSaCas9                 |
| FP: TCCATCAATGGCGGCTTCA<br>RP: GGCCTTGTCCAGTTTCTTCCA     | 150                   | quantify the copies number of dSaCas9 DNA |
